# Supplementary material
Source: MDPI journal article supplement (https://www.mdpi.com/2311-7524/10/2/188)
Supplement: s1 [file s1]

## SUPPLIMENTARY TABLE TITLES

Table-S 7 Correlation Matrix

Table-S 8 :Eigen values of the Correlation Matrix

Table-S 9 Eigen vectors

Table S 10: Mean with DMRT Test Result (RP) for fruit set, fruit drop, fruit retention and fruit cracking in Litchi cv .Bombai

Table S 11 : Mean with DMRT Test Result (RP) for Number of fruits per plant, total number of marketable fruits per plant, total yield per plant and total marketable yield per plant in Litchi cv .Bombai

Table S 12 Mean with DMRT Test Result (RP) for fruit and nut size of Litchi cv.Bombai in Litchi cv .Bombai

Table S13 : Mean with DMRT Test Result (RP) for fruit weight, aril weight, seed weight, pericarp weight, Aril: seed ratio and Aril: pericarp ratio in Litchi cv Bombai

Table S 14 : Mean with DMRT Test Result (RP) for Total solids ,titratable acidity, total sugar, reducing sugar and non-reducing sugar content in Litchi cv Bombai

Table S-15: Mean with DMRT Test Result (RP) for TSS :acid ratio and ascorbic acid content of Litchi cv.Bombai in Litchi cv .Bombai

## SUPPLIMENTARY TABLES

Table-S 7 Correlation Matrix

|                                                                      | <i>Total<br/>number of<br/>fruits/pla<br/>nt</i> | <i>Total<br/>number of<br/>marketabl<br/>e<br/>fruits/pla<br/>nt</i> | Fruit<br>Drop | Fruit<br>retentio<br>n | TS<br>S     | Ascorb<br>ic Acid | Fruit<br>Crackin<br>g | Fruit<br>lengt<br>h | Fruit<br>widt<br>h |
|----------------------------------------------------------------------|--------------------------------------------------|----------------------------------------------------------------------|---------------|------------------------|-------------|-------------------|-----------------------|---------------------|--------------------|
| <i>Total<br/>number of<br/>fruits/pla<br/>nt</i>                     | 1                                                | 0.58513                                                              | 0.1691<br>5   | 0.16922                | 0.2773<br>6 | 0.12454           | -0.07374              | 0.0151<br>9         | -<br>0.0148<br>1   |
| <i>Total<br/>number of<br/>marketabl<br/>e<br/>fruits/pla<br/>nt</i> | 0.58513                                          | 1                                                                    | 0.1727<br>5   | 0.17277                | 0.6088<br>9 | 0.5336            | -0.78749              | 0.1285<br>7         | 0.3949<br>9        |
| <i>Fruit</i>                                                         | -0.16915                                         | -0.17275                                                             | 1             | -1                     | -<br>0.6964 | -0.59812          | 0.05488               | 0.6137<br>4         | 0.239              |

|                        |          |          |          |          |          |          |          |          |          |
|------------------------|----------|----------|----------|----------|----------|----------|----------|----------|----------|
| <i>drop</i>            |          |          |          |          |          |          |          |          |          |
| <i>Fruit retention</i> | 0.16922  | 0.17277  | -1       | 1        | 0.69621  | 0.59812  | -0.05475 | -0.61375 | -0.23949 |
| <i>TSS</i>             | 0.27736  | 0.60889  | -0.6964  | 0.69621  | 1        | 0.93689  | -0.67051 | -0.08445 | 0.39699  |
| <i>Ascorbic acid</i>   | 0.12454  | 0.5336   | -0.59812 | 0.59812  | 0.93689  | 1        | -0.67979 | -0.00337 | 0.41502  |
| <i>Fruit cracking</i>  | -0.07374 | -0.78749 | 0.05488  | -0.05475 | -0.67051 | -0.67979 | 1        | -0.33441 | -0.66847 |
| <i>Fruit length</i>    | 0.01519  | 0.12857  | 0.61374  | -0.61375 | -0.08445 | -0.00337 | -0.33441 | 1        | 0.68664  |
| <i>Fruit width</i>     | -0.01481 | 0.39499  | 0.239    | -0.23949 | 0.39699  | 0.41502  | -0.66847 | 0.68664  | 1        |

Table-S 8 :Eigen values of the Correlation Matrix

|   | Eigen value | Percentage of Variance | Cumulative |
|---|-------------|------------------------|------------|
| 1 | 4.06255     | 45.14%                 | 45.14%     |
| 2 | 2.86499     | 31.83%                 | 76.97%     |
| 3 | 1.1867      | 13.19%                 | 90.16%     |
| 4 | 0.51802     | 5.76%                  | 95.91%     |
| 5 | 0.18924     | 2.10%                  | 98.02%     |
| 6 | 0.12695     | 1.41%                  | 99.43%     |
| 7 | 0.04225     | 0.47%                  | 99.90%     |
| 8 | 0.00932     | 0.10%                  | 100.00%    |
| 9 | 0           | 0.00%                  | 100.00%    |

Table-S 9 Eigen vectors

| <i>Variable</i>                       | <i>PC1</i> | <i>PC2</i> | <i>PC3</i> | <i>PC4</i> | <i>PC5</i> |
|---------------------------------------|------------|------------|------------|------------|------------|
| <i>Total no. fruit per plant</i>      | 0.154      | -0.015     | 0.817      | -0.381     | 0.050      |
| <i>Total no. of Marketable fruits</i> | 0.356      | 0.173      | 0.420      | 0.337      | 0.091      |
| <i>Fruit Drop</i>                     | -0.271     | 0.450      | 0.091      | 0.190      | -0.002     |

|                        |        |        |        |        |        |
|------------------------|--------|--------|--------|--------|--------|
| <i>Fruit retention</i> | 0.271  | -0.450 | -0.090 | -0.189 | 0.000  |
| <i>TSS</i>             | 0.433  | -0.076 | -0.111 | -0.214 | 0.055  |
| <i>Ascorbic Acid</i>   | -0.011 | -0.129 | -0.255 | -0.488 | -0.072 |
| <i>Fruit Cracking</i>  | -0.358 | -0.297 | 0.106  | -0.381 | 0.007  |
| <i>Fruit length</i>    | -0.009 | 0.518  | -0.047 | -0.469 | -0.594 |
| <i>Fruit Breadth</i>   | 0.198  | 0.439  | -0.236 | -0.359 | 0.711  |

**Table S 10: Mean with DMRT Test Result (RP) for fruit set, fruit drop, fruit retention and fruit cracking in Litchi cv.Bombai**

| Treatments     | Treatment details        | Fruit set (%) |         |    | Fruit drop (%) |         |    | Fruit retention (%) |         |    | Fruit cracking (%) |         |    |
|----------------|--------------------------|---------------|---------|----|----------------|---------|----|---------------------|---------|----|--------------------|---------|----|
|                |                          | Mean          | Rp      | P  | mean           | Rp      | p  | mean                | Rp      | p  | mean               | Rp      | p  |
| T <sub>1</sub> | Borax @ 0.5%             | 53.07         | 3.02099 | 2  | 74.47          | 1.96511 | 2  | 25.53               | 4.63414 | 2  | 8.73               | 1.14387 | 2  |
| T <sub>2</sub> | Borax @ 0.3%             | 53.11         | 3.1724  | 3  | 74.69          | 2.0636  | 3  | 25.32               | 4.8664  | 3  | 8.46               | 1.2012  | 3  |
| T <sub>3</sub> | ZnSO <sub>4</sub> @0.75% | 52.1          | 3.26819 | 4  | 79.59          | 2.12591 | 4  | 20.41               | 5.01334 | 4  | 17.25              | 1.23747 | 4  |
| T <sub>4</sub> | ZnSO <sub>4</sub> @ 0.5% | 51.88         | 3.33617 | 5  | 80.01          | 2.17013 | 5  | 19.99               | 5.11762 | 5  | 17.27              | 1.26321 | 5  |
| T <sub>5</sub> | CaCl <sub>2</sub> @ 0.5% | 51.84         | 3.38664 | 6  | 76.7           | 2.20296 | 6  | 23.3                | 5.19504 | 6  | 12.36              | 1.28232 | 6  |
| T <sub>6</sub> | CaCl <sub>2</sub> @ 0.1% | 51.76         | 3.42578 | 7  | 78.53          | 2.22842 | 7  | 21.47               | 5.25508 | 7  | 14.99              | 1.29714 | 7  |
| T <sub>7</sub> | Humic Acid @ 1.5%        | 59.76         | 3.45565 | 8  | 70.19          | 2.24785 | 8  | 29.81               | 5.3009  | 8  | 20.07              | 1.30845 | 8  |
| T <sub>8</sub> | Humic Acid @ 1%          | 58.17         | 3.48037 | 9  | 65.94          | 2.26393 | 9  | 34.07               | 5.33882 | 9  | 19.4               | 1.31781 | 9  |
| T <sub>9</sub> | Seaweed extract @ 0.5%   | 51.6          | 3.49994 | 10 | 73.72          | 2.27666 | 10 | 26.28               | 5.36884 | 10 | 22.54              | 1.32522 | 10 |

|                 |                        |           |             |        |           |             |        |           |             |        |           |             |        |
|-----------------|------------------------|-----------|-------------|--------|-----------|-------------|--------|-----------|-------------|--------|-----------|-------------|--------|
| T <sub>10</sub> | Seaweed extract @ 0.1% | 52.7<br>3 | 3.516<br>42 | 1<br>1 | 74.1<br>8 | 2.287<br>38 | 1<br>1 | 25.8<br>2 | 5.394<br>12 | 1<br>1 | 22.1<br>8 | 1.331<br>46 | 1<br>1 |
| T <sub>11</sub> | NAA (20 ppm)           | 53.5<br>3 | 3.529<br>81 | 1<br>2 | 74.2<br>9 | 2.296<br>09 | 1<br>2 | 25.7<br>1 | 5.414<br>66 | 1<br>2 | 24.3<br>1 | 1.336<br>53 | 1<br>2 |
| T <sub>12</sub> | Control (Water Spray)  | 46.4<br>9 |             |        | 80.9<br>1 |             |        | 19.1      |             |        | 30.3<br>6 |             |        |

\*RP value calculated at 5 % level of significance

**Table S 11 : Mean with DMRT Test Result (RP) for Number of fruits per plant, total number of marketable fruits per plant, total yield per plant and total marketable yield per plant in Litchi cv .Bombai**

| Treat<br>ment<br>s | Treatment<br>details         | Number of<br>fruits per plant |                  |    | Total number of<br>marketable fruits per<br>plant |              |    | Total yield<br>per plant (Kg) |                 |    | Total marketable<br>yield per plant (Kg) |             |    |
|--------------------|------------------------------|-------------------------------|------------------|----|---------------------------------------------------|--------------|----|-------------------------------|-----------------|----|------------------------------------------|-------------|----|
|                    |                              | Me<br>an                      | Rp               | P  | mean                                              | Rp           | p  | me<br>an                      | Rp              | p  | mea<br>n                                 | Rp          | p  |
| T <sub>1</sub>     | Borax @<br>0.5%              | 163<br>6.3<br>1               | 204.<br>547<br>4 | 2  | 1491.9<br>1                                       | 165.919<br>8 | 2  | 30.<br>44                     | 4.4<br>874<br>9 | 2  | 28.1<br>2                                | 3.196<br>97 | 2  |
| T <sub>2</sub>     | Borax @<br>0.3%              | 185<br>8.0<br>3               | 214.<br>799<br>2 | 3  | 1695.0<br>5                                       | 174.235<br>6 | 3  | 38.<br>69                     | 4.7<br>124      | 3  | 35.3<br>4                                | 3.357<br>2  | 3  |
| T <sub>3</sub>     | ZnSO <sub>4</sub><br>@0.75%  | 171<br>7.8                    | 221.<br>285      | 4  | 1416.2<br>3                                       | 179.496<br>6 | 4  | 34.<br>73                     | 4.8<br>546<br>9 | 4  | 28.6<br>8                                | 3.458<br>57 | 4  |
| T <sub>4</sub>     | ZnSO <sub>4</sub> @<br>0.5%  | 197<br>2.0<br>8               | 225.<br>887<br>9 | 5  | 1622.1<br>4                                       | 183.230<br>2 | 5  | 35.<br>85                     | 4.9<br>556<br>7 | 5  | 29.5<br>6                                | 3.530<br>51 | 5  |
| T <sub>5</sub>     | CaCl <sub>2</sub> @<br>0.5%  | 162<br>5.6<br>8               | 229.<br>305<br>1 | 6  | 1425.0<br>5                                       | 186.002<br>2 | 6  | 31.<br>1                      | 5.0<br>306<br>4 | 6  | 28.2<br>9                                | 3.583<br>92 | 6  |
| T <sub>6</sub>     | CaCl <sub>2</sub> @<br>0.1%  | 180<br>1.9<br>4               | 231.<br>955<br>2 | 7  | 1518.8<br>5                                       | 188.151<br>8 | 7  | 32.<br>97                     | 5.0<br>887<br>8 | 7  | 28.1<br>1                                | 3.625<br>34 | 7  |
| T <sub>7</sub>     | Humic<br>Acid @<br>1.5%      | 173<br>0.4<br>2               | 233.<br>977<br>7 | 8  | 1421.5<br>1                                       | 189.792<br>4 | 8  | 32.<br>1                      | 5.1<br>331<br>5 | 8  | 26.3<br>3                                | 3.656<br>95 | 8  |
| T <sub>8</sub>     | Humic<br>Acid @ 1%           | 186<br>4.9<br>1               | 235.<br>651<br>5 | 9  | 1519.2<br>9                                       | 191.15<br>9  | 9  | 34.<br>93                     | 5.1<br>698<br>7 | 9  | 28.3<br>9                                | 3.683<br>11 | 9  |
| T <sub>9</sub>     | Seaweed<br>extract @<br>0.5% | 178<br>5.0<br>4               | 236.<br>976<br>5 | 10 | 1373.8<br>6                                       | 192.224<br>9 | 10 | 36.<br>41                     | 5.1<br>989<br>4 | 10 | 26.6<br>8                                | 3.703<br>82 | 10 |

|                 |                        |                 |                  |           |             |              |           |           |                 |           |           |             |           |
|-----------------|------------------------|-----------------|------------------|-----------|-------------|--------------|-----------|-----------|-----------------|-----------|-----------|-------------|-----------|
| T <sub>10</sub> | Seaweed extract @ 0.1% | 183<br>6.7<br>9 | 238.<br>092<br>4 | <b>11</b> | 1297.6<br>7 | 193.13       | <b>11</b> | 36.<br>68 | 5.2<br>234<br>2 | <b>11</b> | 25.9<br>2 | 3.721<br>26 | <b>11</b> |
| T <sub>11</sub> | NAA (20 ppm)           | 173<br>5.2<br>7 | 238.<br>999      | <b>12</b> | 1374.6<br>9 | 193.865<br>4 | <b>12</b> | 32.<br>79 | 5.2<br>433<br>1 | <b>12</b> | 26.0<br>2 | 3.735<br>43 | <b>12</b> |
| T <sub>12</sub> | Control (Water Spray)  | 162<br>7.7<br>7 |                  |           | 1144.1<br>8 |              |           | 29.<br>65 |                 |           | 20.8<br>8 |             |           |

\*RP value calculated at 5 % level of significance

**Table S 12 Mean with DMRT Test Result (RP) for fruit and nut size of Litchi cv.Bombai in Litchi cv .Bombai**

| Treatments     | Treatment details        | Fruit length (cm) |             |           | Fruit width (cm) |             |           | Nut length (cm) |                   |           | Nut width (cm) |             |           |
|----------------|--------------------------|-------------------|-------------|-----------|------------------|-------------|-----------|-----------------|-------------------|-----------|----------------|-------------|-----------|
|                |                          | Mean              | Rp          | P         | mean             | Rp          | p         | Mean            | Rp                | p         | mean           | Rp          | p         |
| T <sub>1</sub> | Borax @ 0.5%             | 3.14              | 0.351<br>96 | <b>2</b>  | 3.02             | 0.351<br>96 | <b>2</b>  | 2.53            | <b>0.35</b><br>42 | <b>2</b>  | 1.49           | 0.175<br>98 | <b>2</b>  |
| T <sub>2</sub> | Borax @ 0.3%             | 3.66              | 0.369<br>6  | <b>3</b>  | 3.12             | 0.369<br>6  | <b>3</b>  | 2.49            | <b>0.34</b><br>86 | <b>3</b>  | 1.7            | 0.184<br>8  | <b>3</b>  |
| T <sub>3</sub> | ZnSO <sub>4</sub> @0.75% | 3.53              | 0.380<br>76 | <b>4</b>  | 3.01             | 0.380<br>76 | <b>4</b>  | 2.61            | <b>0.36</b><br>54 | <b>4</b>  | 1.58           | 0.190<br>38 | <b>4</b>  |
| T <sub>4</sub> | ZnSO <sub>4</sub> @ 0.5% | 3.33              | 0.388<br>68 | <b>5</b>  | 2.95             | 0.388<br>68 | <b>5</b>  | 2.31            | <b>0.32</b><br>34 | <b>5</b>  | 1.64           | 0.194<br>34 | <b>5</b>  |
| T <sub>5</sub> | CaCl <sub>2</sub> @ 0.5% | 3.56              | 0.394<br>56 | <b>6</b>  | 3.08             | 0.394<br>56 | <b>6</b>  | 2.38            | <b>0.33</b><br>32 | <b>6</b>  | 1.53           | 0.197<br>28 | <b>6</b>  |
| T <sub>6</sub> | CaCl <sub>2</sub> @ 0.1% | 3.41              | 0.399<br>12 | <b>7</b>  | 2.91             | 0.399<br>12 | <b>7</b>  | 2.43            | <b>0.34</b><br>02 | <b>7</b>  | 1.44           | 0.199<br>56 | <b>7</b>  |
| T <sub>7</sub> | Humic Acid @ 1.5%        | 3.03              | 0.402<br>6  | <b>8</b>  | 2.95             | 0.402<br>6  | <b>8</b>  | 2.33            | <b>0.32</b><br>62 | <b>8</b>  | 1.61           | 0.201<br>3  | <b>8</b>  |
| T <sub>8</sub> | Humic Acid @ 1%          | 2.83              | 0.405<br>48 | <b>9</b>  | 2.61             | 0.405<br>48 | <b>9</b>  | 2.26            | <b>0.31</b><br>64 | <b>9</b>  | 1.56           | 0.202<br>74 | <b>9</b>  |
| T <sub>9</sub> | Seaweed extract @ 0.5%   | 3.43              | 0.407<br>0  | <b>10</b> | 2.92             | 0.407<br>0  | <b>10</b> | 2.48            | <b>0.34</b><br>0  | <b>10</b> | 1.57           | 0.203<br>0  | <b>10</b> |

|                 |                        |      |             |        |      |             |        |      |            |        |      |             |        |
|-----------------|------------------------|------|-------------|--------|------|-------------|--------|------|------------|--------|------|-------------|--------|
|                 |                        |      | 76          |        |      | 76          |        |      | 72         |        |      | 88          |        |
| T <sub>10</sub> | Seaweed extract @ 0.1% | 3.45 | 0.409<br>68 | 1<br>1 | 3.02 | 0.409<br>68 | 1<br>1 | 2.5  | 0.35       | 1<br>1 | 1.65 | 0.204<br>84 | 1<br>1 |
| T <sub>11</sub> | NAA (20 ppm)           | 3.05 | 0.411<br>24 | 1<br>2 | 2.87 | 0.411<br>24 | 1<br>2 | 2.64 | 0.36<br>96 | 1<br>2 | 1.54 | 0.205<br>62 | 1<br>2 |
| T <sub>12</sub> | Control (Water Spray)  | 3.27 |             |        | 2.66 |             |        | 2.85 |            |        | 1.73 |             |        |

\*RP value calculated at 5 % level of significance

**Table S13 : Mean with DMRT Test Result (RP) for fruit weight, aril weight, seed weight, pericarp weight, Aril: seed ratio and Aril: pericarp ratio in Litchi cv Bombai**

| Treatments     | Treatment details        | Fruit weight (g) |       |   | Aril weight (g) |       |   | Seed weight (g) |       |   | Pericarp weight (g) |       |   | Aril :seed ratio |       |   | Aril:pericarp ratio |       |   |
|----------------|--------------------------|------------------|-------|---|-----------------|-------|---|-----------------|-------|---|---------------------|-------|---|------------------|-------|---|---------------------|-------|---|
|                |                          | Mean             | Rp    | P | mean            | Rp    | p | mean            | Rp    | p | Mean                | Rp    | p | mean             | Rp    | p | Mean                | Rp    | p |
| T <sub>1</sub> | Borax @ 0.5%             | 18.91            | 1.495 | 2 | 14.17           | 1.026 | 2 | 2.65            | 0.234 | 2 | 2.35                | 0.234 | 2 | 5.35             | 0.791 | 2 | 6.04                | 0.733 | 2 |
| T <sub>2</sub> | Borax @ 0.3%             | 20.85            | 1.570 | 3 | 16.01           | 1.078 | 3 | 2.19            | 0.246 | 3 | 2.23                | 0.24  | 3 | 7.31             | 0.831 | 3 | 7.18                | 0.77  | 3 |
| T <sub>3</sub> | ZnSO <sub>4</sub> @0.75% | 20.39            | 1.618 | 4 | 14.86           | 1.110 | 4 | 2.45            | 0.253 | 4 | 2.3                 | 0.253 | 4 | 6.07             | 0.567 | 4 | 6.45                | 0.932 | 4 |
| T <sub>4</sub> | ZnSO <sub>4</sub> @ 0.5% | 18.3             | 1.651 | 5 | 13.07           | 1.133 | 5 | 2.92            | 0.259 | 5 | 2.28                | 0.259 | 5 | 4.47             | 0.874 | 5 | 5.75                | 0.975 | 5 |
| T <sub>5</sub> | CaCl <sub>2</sub> @ 0.5% | 19.8             | 1.676 | 6 | 15.7            | 1.150 | 6 | 2.38            | 0.263 | 6 | 2.33                | 0.263 | 6 | 6.62             | 0.876 | 6 | 6.77                | 0.822 | 6 |
| T <sub>6</sub> | CaCl <sub>2</sub> @ 0.1% | 18.59            | 1.696 | 7 | 14.04           | 1.164 | 7 | 2.81            | 0.266 | 7 | 2.35                | 0.266 | 7 | 5.07             | 0.980 | 7 | 5.98                | 0.315 | 7 |
| T <sub>7</sub> | Humic Acid @             | 18.6             | 1.711 | 8 | 13.74           | 1.174 | 8 | 2.68            | 0.268 | 8 | 2.68                | 0.268 | 8 | 4.05             | 0.905 | 8 | 5.38                | 0.88  | 8 |

|                 |                        |       |         |  |       |         |  |      |         |  |      |         |  |      |         |  |      |         |  |
|-----------------|------------------------|-------|---------|--|-------|---------|--|------|---------|--|------|---------|--|------|---------|--|------|---------|--|
|                 | 1.5%                   | 3     | 05      |  | .5    | 25      |  | 82   | 4       |  | 43   | 4       |  | 82   | 85      |  | 56   | 75      |  |
| T <sub>8</sub>  | Humic Acid @ 1%        | 18.84 | 1.72329 |  | 13.86 | 1.18265 |  | 2.65 | 0.27032 |  | 2.37 | 0.27032 |  | 5.27 | 0.91233 |  | 5.84 | 0.84475 |  |
| T <sub>9</sub>  | Seaweed extract @ 0.5% | 19.48 | 1.73298 |  | 13.39 | 1.1893  |  | 2.86 | 0.27184 |  | 2.4  | 0.27184 |  | 4.71 | 0.91746 |  | 5.59 | 0.8495  |  |
| T <sub>10</sub> | Seaweed extract @ 0.1% | 20.02 | 1.74114 |  | 14.49 | 1.1949  |  | 2.57 | 0.27312 |  | 2.3  | 0.27312 |  | 5.61 | 0.92178 |  | 6.26 | 0.8535  |  |
| T <sub>11</sub> | NAA (20 ppm)           | 18.95 | 1.74775 |  | 13.48 | 1.19945 |  | 3.12 | 0.27416 |  | 2.43 | 0.27416 |  | 4.49 | 0.92529 |  | 5.64 | 0.85675 |  |
| T <sub>12</sub> | Control (Water Spray)  | 18.26 |         |  | 12.2  |         |  | 3.09 |         |  | 2.54 |         |  | 3.95 |         |  | 4.81 |         |  |

\*RP value calculated at 5 % level of significance

**Table S:14 : Mean with DMRT Test Result (RP) for Total solids ,titratable acidity, total sugar, reducing sugar and non-reducing sugar content in Litchi cv Bombai**

| Treatments     | Treatment details        | TSS (° Brix) |         |   | Acidity (%) |         |   | Total Sugar (%) |         |   | Reducing sugar (%) |         |   | Non-reducing sugar (%) |         |   |
|----------------|--------------------------|--------------|---------|---|-------------|---------|---|-----------------|---------|---|--------------------|---------|---|------------------------|---------|---|
|                |                          | Mean         | Rp      | P | mean        | Rp      | p | mean            | Rp      | p | mean               | Rp      | p | mean                   | Rp      | p |
| T <sub>1</sub> | Borax @ 0.5%             | 14.02        | 1.26119 | 2 | 0.78        | 0.14665 | 2 | 10.12           | 0.99722 | 2 | 7.93               | 0.90923 | 2 | 2.07                   | 0.96789 | 2 |
| T <sub>2</sub> | Borax @ 0.3%             | 14.07        | 1.3244  | 3 | 0.72        | 0.154   | 3 | 10.4            | 1.0472  | 3 | 8.15               | 0.9548  | 3 | 2.14                   | 1.0164  | 3 |
| T <sub>3</sub> | ZnSO <sub>4</sub> @0.75% | 11.47        | 1.36439 | 4 | 0.85        | 0.15865 | 4 | 8.88            | 1.07882 | 4 | 7.01               | 0.98363 | 4 | 1.78                   | 1.04709 | 4 |
| T <sub>4</sub> | ZnSO <sub>4</sub> @ 0.5% | 11.98        | 1.39277 | 5 | 0.85        | 0.16195 | 5 | 8.49            | 1.10126 | 5 | 6.65               | 1.00409 | 5 | 1.75                   | 1.06887 | 5 |
| T <sub>5</sub> | CaCl <sub>2</sub> @ 0.5% | 12.7         | 1.41384 | 6 | 0.82        | 0.1644  | 6 | 9.03            | 1.11792 | 6 | 7.12               | 1.01928 | 6 | 1.82                   | 1.08504 | 6 |
| T <sub>6</sub> | CaCl <sub>2</sub> @ 0.1% | 12.          | 1.43    | 7 | 0.8         | 0.16    | 7 | 9.0             | 1.13    | 7 | 7.0                | 1.03    | 7 | 1.8                    | 1.09    | 7 |

|                 |                        |       |         |    |      |         |    |      |         |    |      |         |    |      |         |    |
|-----------------|------------------------|-------|---------|----|------|---------|----|------|---------|----|------|---------|----|------|---------|----|
|                 |                        | 55    | 018     |    | 2    | 63      |    | 2    | 084     |    | 8    | 106     |    | 4    | 758     |    |
| T <sub>7</sub>  | Humic Acid @ 1.5%      | 13.42 | 1.44265 | 8  | 0.8  | 0.16775 | 8  | 9.88 | 1.1407  | 8  | 7.82 | 1.04005 | 8  | 1.96 | 1.10715 | 8  |
| T <sub>8</sub>  | Humic Acid @ 1%        | 13.73 | 1.45297 | 9  | 0.79 | 0.16895 | 9  | 9.98 | 1.14886 | 9  | 7.88 | 1.04749 | 9  | 2    | 1.11507 | 9  |
| T <sub>9</sub>  | Seaweed extract @ 0.5% | 12.95 | 1.46114 | 10 | 0.88 | 0.1699  | 10 | 9.28 | 1.15532 | 10 | 7.27 | 1.05338 | 10 | 1.92 | 1.12134 | 10 |
| T <sub>10</sub> | Seaweed extract @ 0.1% | 13.22 | 1.46802 | 11 | 0.91 | 0.1707  | 11 | 9.53 | 1.16076 | 11 | 7.49 | 1.05834 | 11 | 1.94 | 1.12662 | 11 |
| T <sub>11</sub> | NAA (20 ppm)           | 11.78 | 1.47361 | 12 | 0.93 | 0.17135 | 12 | 8.63 | 1.16518 | 12 | 6.78 | 1.06237 | 12 | 1.76 | 1.13091 | 12 |
| T <sub>12</sub> | Control (Water Spray)  | 9.82  |         |    | 1    |         |    | 7.85 |         |    | 6.08 |         |    | 1.69 |         |    |

\*RP value calculated at 5 % level of significance

**Table S-15: Mean with DMRT Test Result (RP) for TSS :acid ratio and ascorbic acid content of Litchi cv.Bombai in Litchi cv .Bombai**

| Treatments      | Treatment details        | TSS : acid ratio |         |    | Ascorbic acid (mg/100 g) |         |    |
|-----------------|--------------------------|------------------|---------|----|--------------------------|---------|----|
|                 |                          | Mean             | Rp      | P  | Mean                     | Rp      | p  |
| T <sub>1</sub>  | Borax @ 0.5%             | 18.76            | 3.66625 | 2  | 32.06                    | 0.96789 | 2  |
| T <sub>2</sub>  | Borax @ 0.3%             | 20.33            | 3.85    | 3  | 32.22                    | 1.0164  | 3  |
| T <sub>3</sub>  | ZnSO <sub>4</sub> @0.75% | 14.39            | 3.96625 | 4  | 28.11                    | 1.04709 | 4  |
| T <sub>4</sub>  | ZnSO <sub>4</sub> @ 0.5% | 14.74            | 4.04875 | 5  | 28.5                     | 1.06887 | 5  |
| T <sub>5</sub>  | CaCl <sub>2</sub> @ 0.5% | 16.35            | 4.11    | 6  | 29.61                    | 1.08504 | 6  |
| T <sub>6</sub>  | CaCl <sub>2</sub> @ 0.1% | 16               | 4.1575  | 7  | 28.72                    | 1.09758 | 7  |
| T <sub>7</sub>  | Humic Acid @ 1.5%        | 17.25            | 4.19375 | 8  | 30.67                    | 1.10715 | 8  |
| T <sub>8</sub>  | Humic Acid @ 1%          | 17.96            | 4.22375 | 9  | 30.56                    | 1.11507 | 9  |
| T <sub>9</sub>  | Seaweed extract @ 0.5%   | 15.17            | 4.2475  | 10 | 30                       | 1.12134 | 10 |
| T <sub>10</sub> | Seaweed extract @ 0.1%   | 14.98            | 4.2675  | 11 | 30.11                    | 1.12662 | 11 |
| T <sub>11</sub> | NAA (20 ppm)             | 12.74            | 4.28375 | 12 | 27.83                    | 1.13091 | 12 |



|                 |                       |      |  |  |       |  |  |
|-----------------|-----------------------|------|--|--|-------|--|--|
| T <sub>12</sub> | Control (Water Spray) | 9.99 |  |  | 27.06 |  |  |
|-----------------|-----------------------|------|--|--|-------|--|--|

\*RP value calculated at 5 % level of significance
